# Supplementary material for: Assembling and positioning latex nanoparticles via controlled evaporative self-assembly
Source: Royal Society of Chemistry journal article supplement (doi:10.1039/c1jm11603g), 2011-01-01
Supplement: c1jm11603g.pdf [file c1jm11603g.pdf]

## Supporting Information

# Assembling and Positioning Latex Nanoparticles via Controlled Evaporative Self-Assembly

Wei Han<sup>1,2</sup> and Zhiqun Lin<sup>1,2\*</sup>

1. School of Materials Science and Engineering, Georgia Institute of Technology, Atlanta, GA 30332.
2. Department of Materials Science and Engineering, Iowa State University, Ames, Iowa 50011

\*To whom correspondence should be addressed. E-mail: [zhiqun.lin@mse.gatech.edu](mailto:zhiqun.lin@mse.gatech.edu)

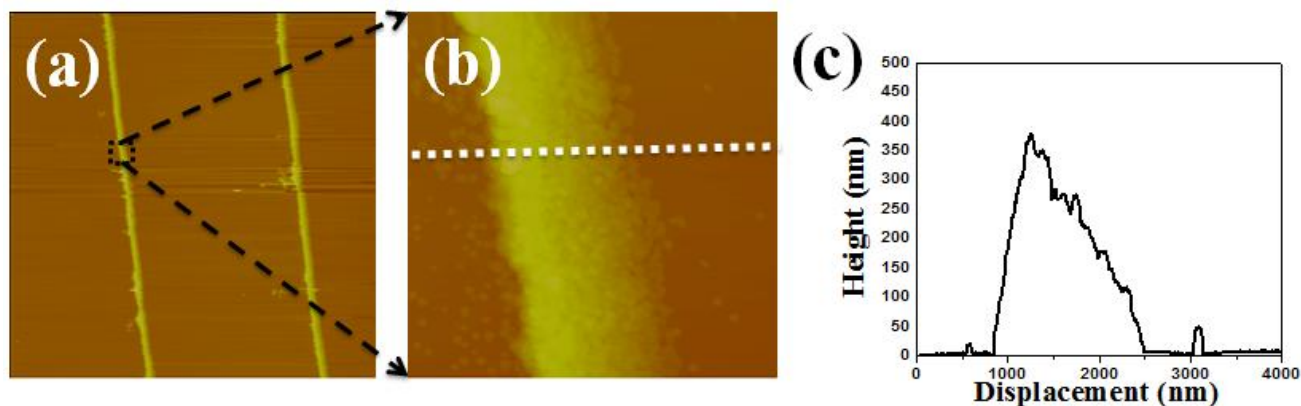

**Figure S1.** (a-b) AFM images of the stripes formed from the 50 nm nanoparticles. (c) Corresponding section analysis in (b). Image sizes: (a)  $80 \times 80 \mu\text{m}^2$  and (b)  $4 \times 4 \mu\text{m}^2$ .

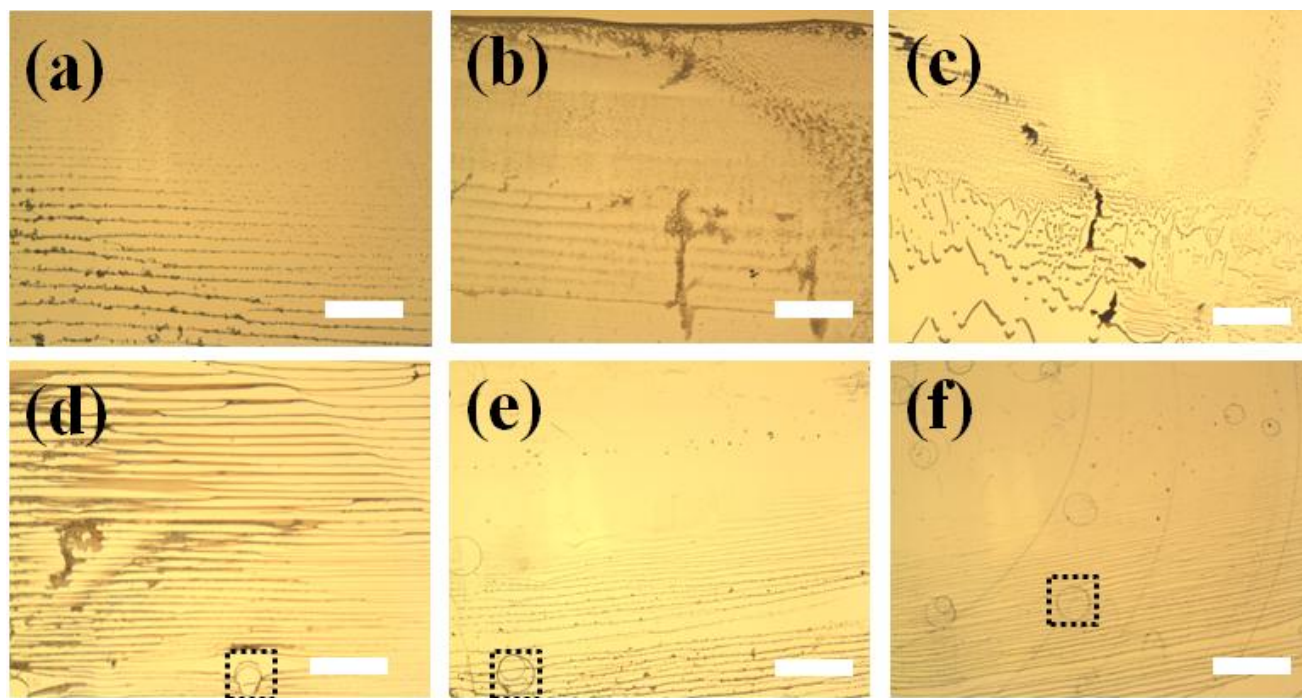

**Figure S2.** Optical micrographs of stripes composed of PS latex nanoparticles formed from controlled evaporative self-assembly at different temperatures. Upper panels: the aqueous solution containing (a) 50 nm particles, (b) 500 nm particles, and (c) mixed nanoparticles evaporated at 60°C, respectively. Lower panels: the aqueous solution containing (d) 50 nm particles, (e) 500 nm particles, and (f) mixed nanoparticles evaporated at 100°C, respectively. At lower temperature ( $T = 60^{\circ}\text{C}$ ), less ordered patterns were observed. By contrast, at higher temperature ( $T = 100^{\circ}\text{C}$ ), due to the formation of bubbles at the boiling temperature of water, some small circles were formed around the stripes, marked inside dashed boxes. Scale bar = 250  $\mu\text{m}$ .
